# Supplementary material for: Synthesis of silver particles stabilized by a bifunctional SiHx–NHy–PMHS oligomer as recyclable nanocatalysts for the catalytic reduction of 4-nitrophenol
Source: Royal Society of Chemistry journal article supplement (doi:10.1039/c9ra04711e), 2019-01-01
Supplement: c9ra04711e1.pdf [file c9ra04711e1.pdf]

Supplementary Information for

**Synthesis of silver particles stabilized by a bifunctional  $\text{SiH}_x\text{-NH}_y\text{-PMHS}$  oligomer  
as recyclable nanocatalysts for catalytic reduction of 4-nitrophenol.**

Zhen Wang <sup>a,b</sup>, Shun Yao<sup>a</sup>, Shaofei Pan<sup>a</sup>, Jian Su <sup>a</sup>, Changqing Fang <sup>a\*</sup>, Xianliang Hou<sup>a</sup>, Mei Zhan<sup>b</sup>

<sup>a</sup>Faculty of Printing, Packaging and Digital Media Technology, Xi'an University of Technology,  
Xi'an, Shaanxi 710048, P. R. China.

<sup>b</sup>State Key Laboratory of Solidification Processing, Northwestern Polytechnical University, Xi'an  
710072, P. R. China.

\*Corresponding authors: Changqing Fang;

E-mail: [fcqxaut@163.com](mailto:fcqxaut@163.com)

Tel.: +86 29 82312038, Fax: +86 29 82312512

**Contents**

**Figure S1.** <sup>1</sup>H, <sup>13</sup>C, <sup>29</sup>Si NMR of  $\text{SiH}_x\text{-NH}_y\text{-PMHS}$  IV.

**Figure S2.** <sup>1</sup>H, <sup>13</sup>C, <sup>29</sup>Si NMR of  $\text{SiH}_x\text{-NH}_y\text{-PMHS}$  V.

**Figure S3.** XPS survey scan of Ag/SiO<sub>2</sub>-1.

**Figure S4.** STEM images of Ag/SiO<sub>2</sub>-1; (a) before catalytic test (b) after catalytic test for seven successive reduction of 4-NP.

**Figure S5.** XPS spectra of Ag/SiO<sub>2</sub>-1; (a) before catalytic test (b) after catalytic test for seven successive reduction of 4-NP.

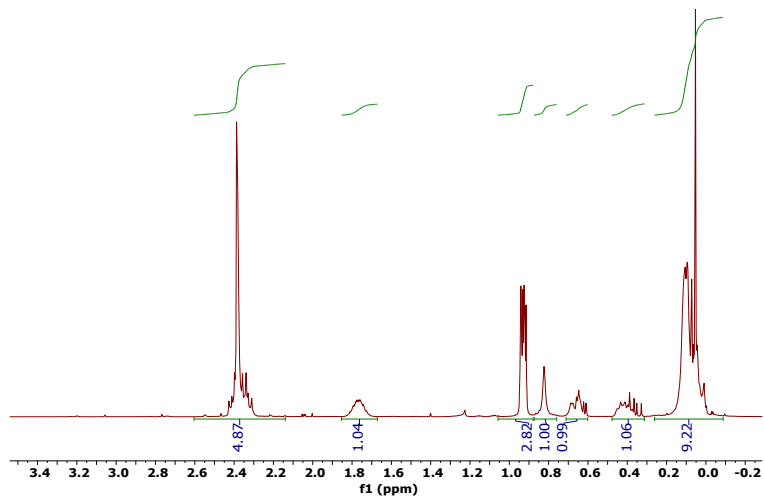

Figure S-1a.  $^1\text{H}$  NMR of  $\text{SiH}_x\text{-NH}_y\text{-PMHS IV}$

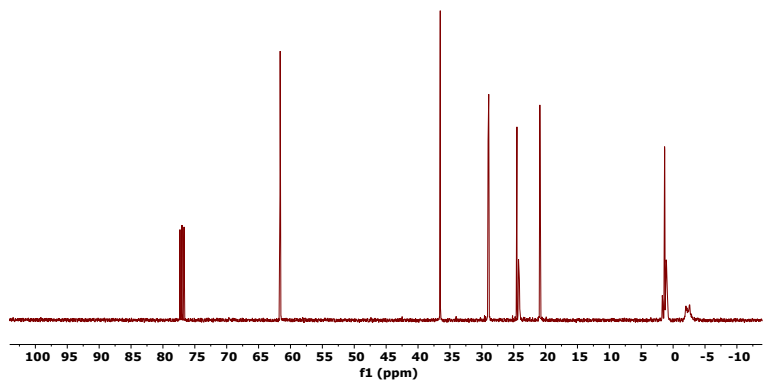

Figure S-1b.  $^{13}\text{C}$  NMR of  $\text{SiH}_x\text{-NH}_y\text{-PMHS IV}$

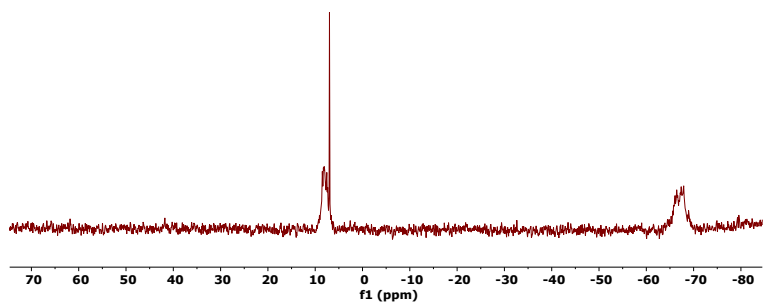

Figure S-1c.  $^{29}\text{Si}$  NMR of  $\text{SiH}_x\text{-NH}_y\text{-PMHS IV}$

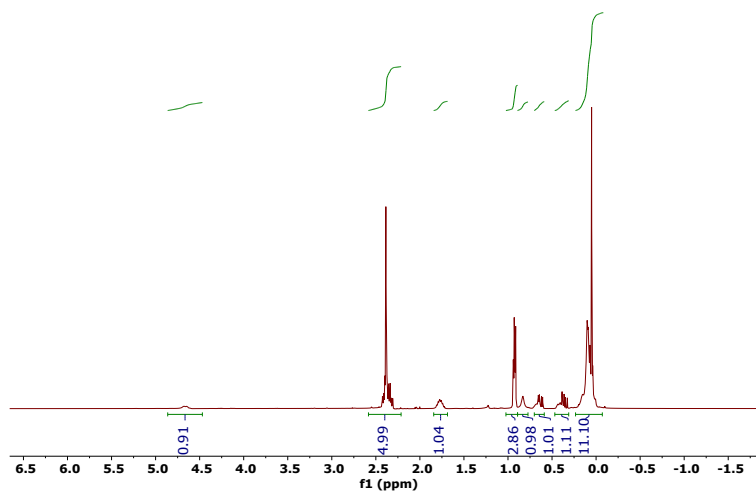

Figure S-2a.  $^1\text{H}$  NMR of  $\text{SiH}_x\text{-NH}_y\text{-PMHS V}$

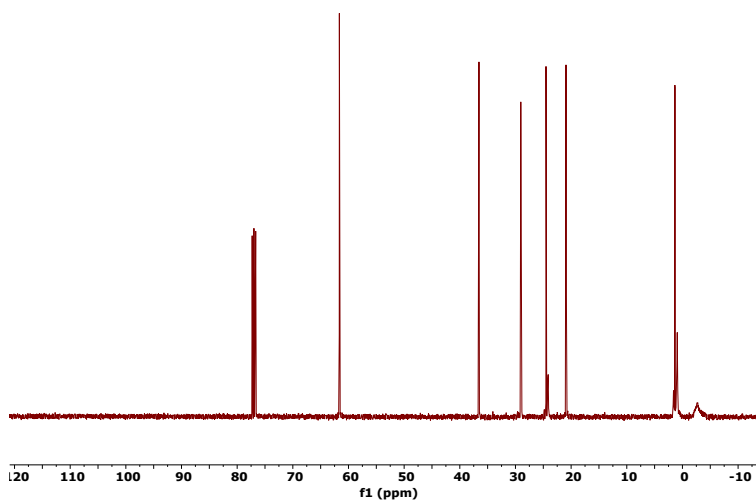

Figure S-2b.  $^{13}\text{C}$  NMR of  $\text{SiH}_x\text{-NH}_y\text{-PMHS V}$

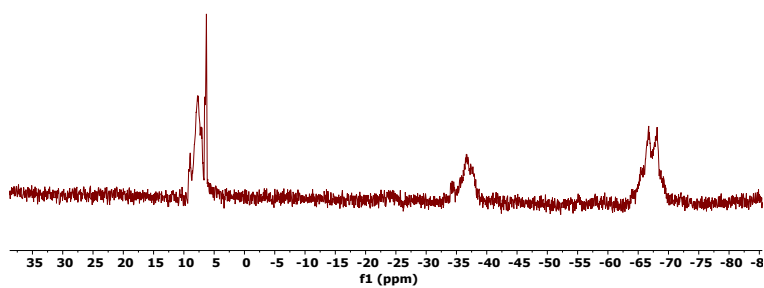

Figure S-2c.  $^{29}\text{Si}$  NMR of  $\text{SiH}_x\text{-NH}_y\text{-PMHS V}$

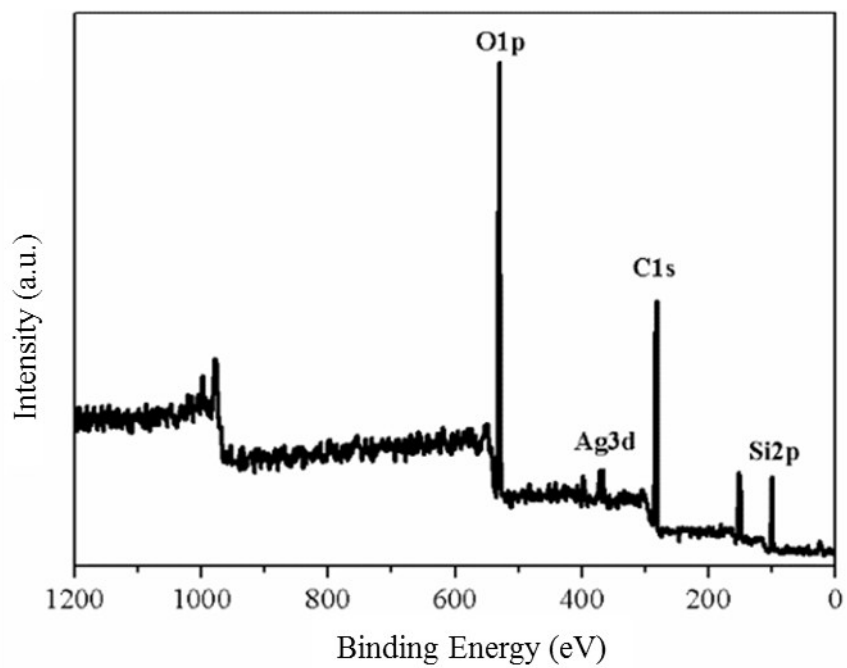

Figure S-3 XPS survey scan of Ag/SiO<sub>2</sub>-1.

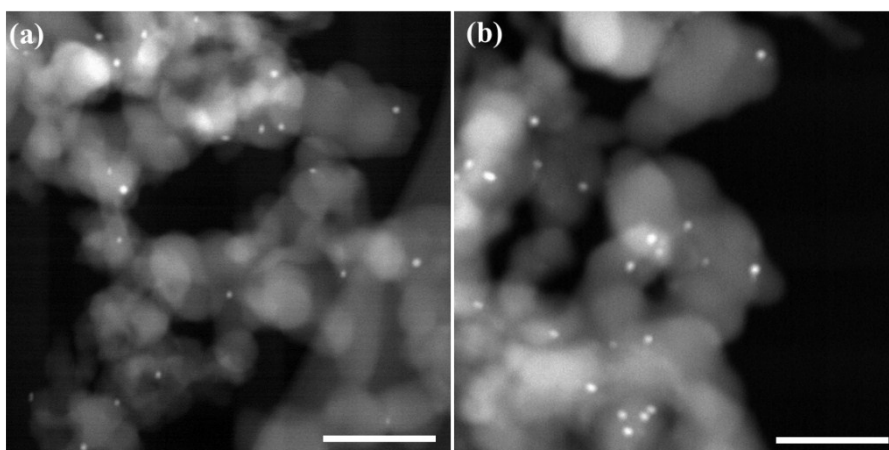

Figure S-4 STEM images of Ag/SiO<sub>2</sub>-1; (a) before catalytic test (b) after catalytic test for seven successive reduction of 4-NP. Scale bar is 20 nm.

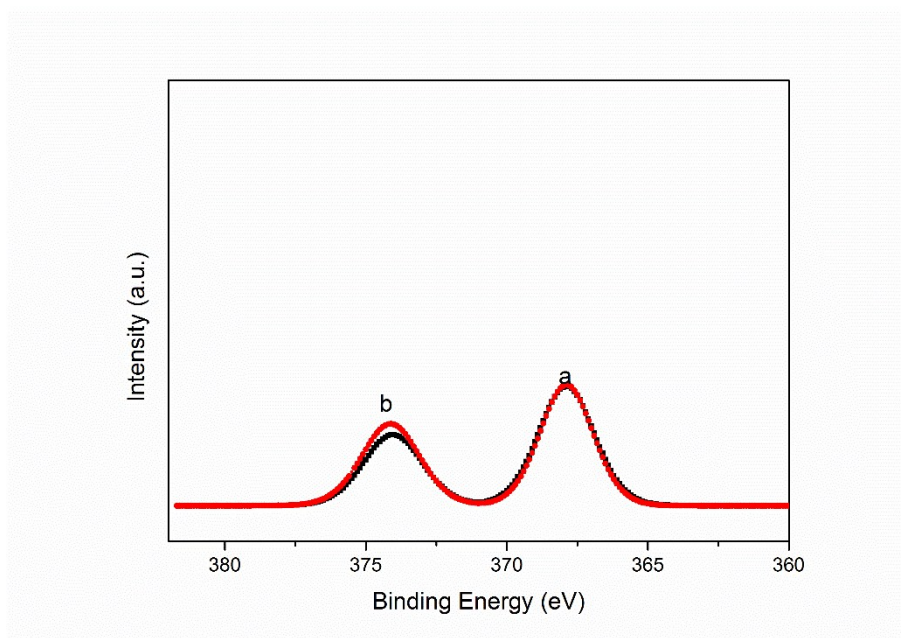

Figure S-5 XPS spectra of Ag/SiO<sub>2</sub>-1; (a) before catalytic test (b) after catalytic test for seven successive reduction of 4-NP.
